# Supplementary material
Source: publisher figshare collection journal article supplement (https://frontiersin.figshare.com/ndownloader/files/18525590)
Supplement: Supplementary file [file 18525590]

# Supplementary Material

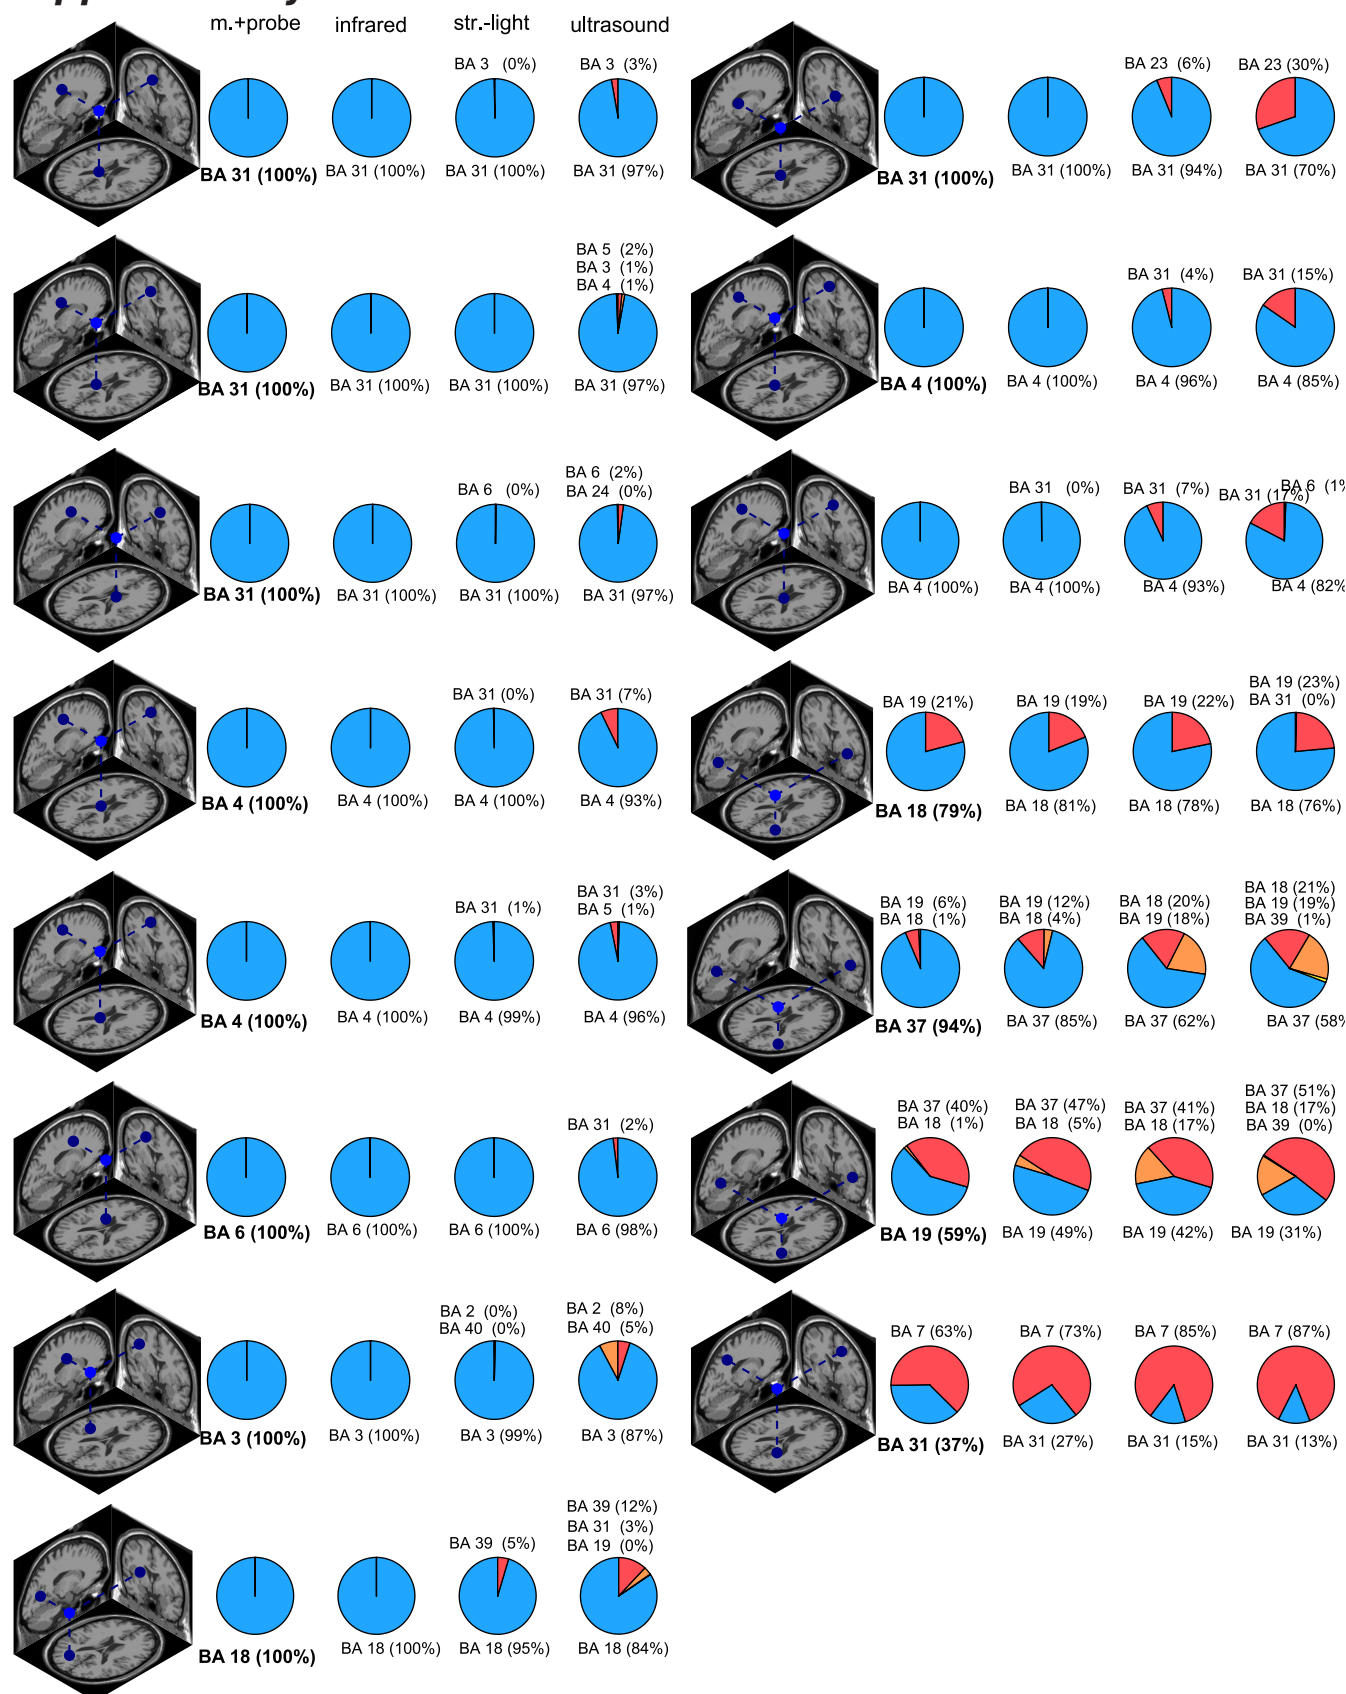

Figure S1. Brodmann area (BA) accuracy for the ICs not presented in the Figure 6.

**Table S1.** Manufacturer-reported accuracy and precision, calibration error, and digitization variability. Manufacturer accuracy and precision, if available, are based on the device information provided by the manufacturer. Calibration error, if available, is provided by the device calibration software. Digitization reliability is from the results of this study. str.-light 3D scan = structured-light 3D scan. mocap = motion capture. N/A = not available.

| method             | manufacturer accuracy & precision (cm)             | calibration error (cm)    | digitization reliability (cm) |
|--------------------|----------------------------------------------------|---------------------------|-------------------------------|
| ultrasound         | <0.08 (precision)                                  | <0.1                      | 0.86                          |
| infrared 3D scan   | <0.1 (precision), for scanning objects 50 cm apart | N/A                       | 0.24                          |
| str.-light 3D scan | <0.03 (accuracy)                                   | N/A                       | 0.50                          |
| mocap probe        | N/A                                                | <0.04 mocap + <0.04 probe | 0.15                          |
| mocap              | N/A                                                | <0.04                     | 0.001                         |
